# Supplementary material
Source: Research Square preprint supplement (doi:10.21203/rs.3.rs-9249060/v1)
Supplement: Supplementary file 1 [file e2b9158d5b3b4ea3a1afcbaf.docx]

**Supplementary materials for:**

**Interface velocity-driven non-equilibrium nitrogen supersaturation in additive manufacture: a universal strategy for breaking strength-corrosion trade off**

Mujin Yang a, Daobin Zhang a, Dingding Zhu a, Bo Du a, Minglin He a, Xiaomei Zhang a, Junxi Zhu a, Biyong Lu a, Jiang Yi a, #, Zhifu Yao c, #, Cuiping Wang d, e, Xingjun Liu f, Shuai Wang a, b, #

a Department of Mechanical and Energy Engineering, Southern University of Science and Technology, 1088 Xueyuan Blvd, Shenzhen, Guangdong 518055, PR China

b College of Energy and Engineering, Zhejiang University, Hangzhou, Zhejiang 310027, PR China

c Sino-German College of Intelligent Manufacturing, Shenzhen Technology University, Shenzhen, 518118, PR China

d Fujian Key Laboratory of Surface and Interface Engineering for High Performance Materials, School of Materials Science, Xiamen University, Xiamen, Fujian 361005, PR China

e Xiamen Key Laboratory of High Performance Metals and Materials, School of Materials Science, Xiamen University, Xiamen, Fujian 361005, PR China

f Department of Materials Science and Engineering, Harbin Institute of Technology, Shenzhen, Guangdong 518055, PR China

# Corresponding authors.

## Corresponding authors. E-mail addresses: [yij@sustech.edu.cn](mailto:yij@sustech.edu.cn) (J. Yi); [yaozhifu@sztu.edu.cn](mailto:yaozhifu@sztu.edu.cn) (Z. Yao); [wangs@sustech.edu.cn](mailto:wangs@sustech.edu.cn) (S. Wang).

| **Table S1**. Chemical composition of the prepared powder in this work | | | | | | | | | | |
| --- | --- | --- | --- | --- | --- | --- | --- | --- | --- | --- |
| 6N | Cr | Mo | Ni | Si | N | Mn | O | Al | C | Fe |
| wt. % | 31.9 | 3.59 | 8.34 | 0.24 | 0.63 | 0.02 | 0.09 | 0.19 | 0.02 | Bal. |
| * Minor elements O, N and C were determined by the ONH analyzer (HORIBA EMGA-830) and the CS analyzer (HIR 944), respectively; Others were determined by ICP method. | | | | | | | | | | |

| **Table S2.** The LPBF printing parameters with varying scanning speeds and the sampling label in this work | | |
| --- | --- | --- |
| V(mm/s)  H (μm) | 600 | 1400 |
| 80 | LSP | HSP |

| **Table S3.** Quantitative contributions of various strengthening mechanisms to the yield strength. | | | |
| --- | --- | --- | --- |
| Strengthening mechanism | LSP  (MPa) | HSP  (MPa) | Increment from  LSP to HSP (MPa) |
| Grain refinement (Hall-Petch) | 108 | 220 | +112 |
| Dislocation strengthening | 315 | 315 | 0 |
| Solid solution strengthening | 439 | 439 | 0 |
| Subtotal (Theoretical base) | 862 | 974 | +112 |
| Experimental yield strength | 1200 | 1600 | +400 |
| Precipitation strengthening (Δσp)* | 338 | 626 | +288 |

*(Δσp) = Experimental Yield Strength - Subtotal (Theoretical Base)


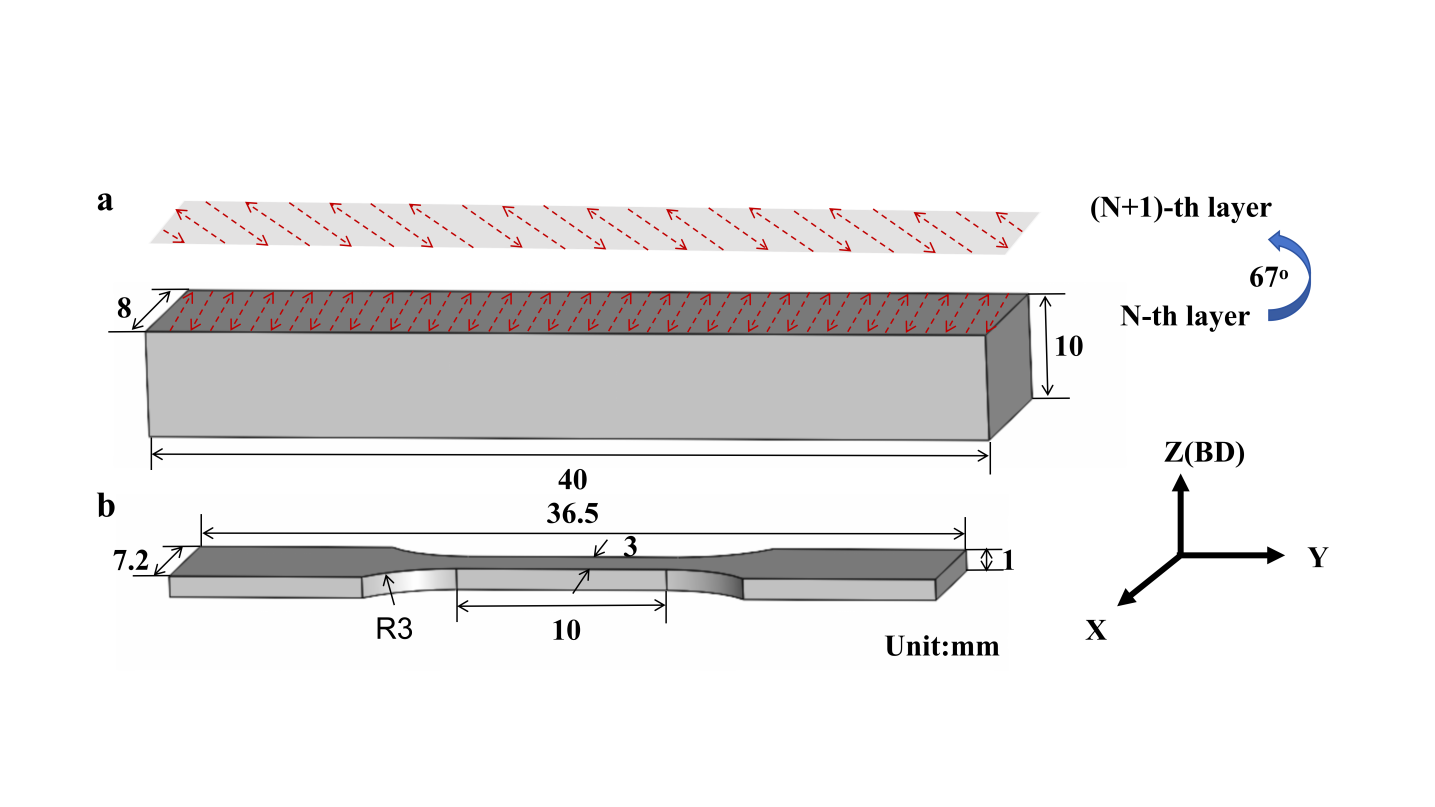


**Fig. S1.** Schematics depicting the geometry of as-printed high nitrogen (6N) stainless steel (a) and size of the flat dogbone-shaped tensile samples (b).

**
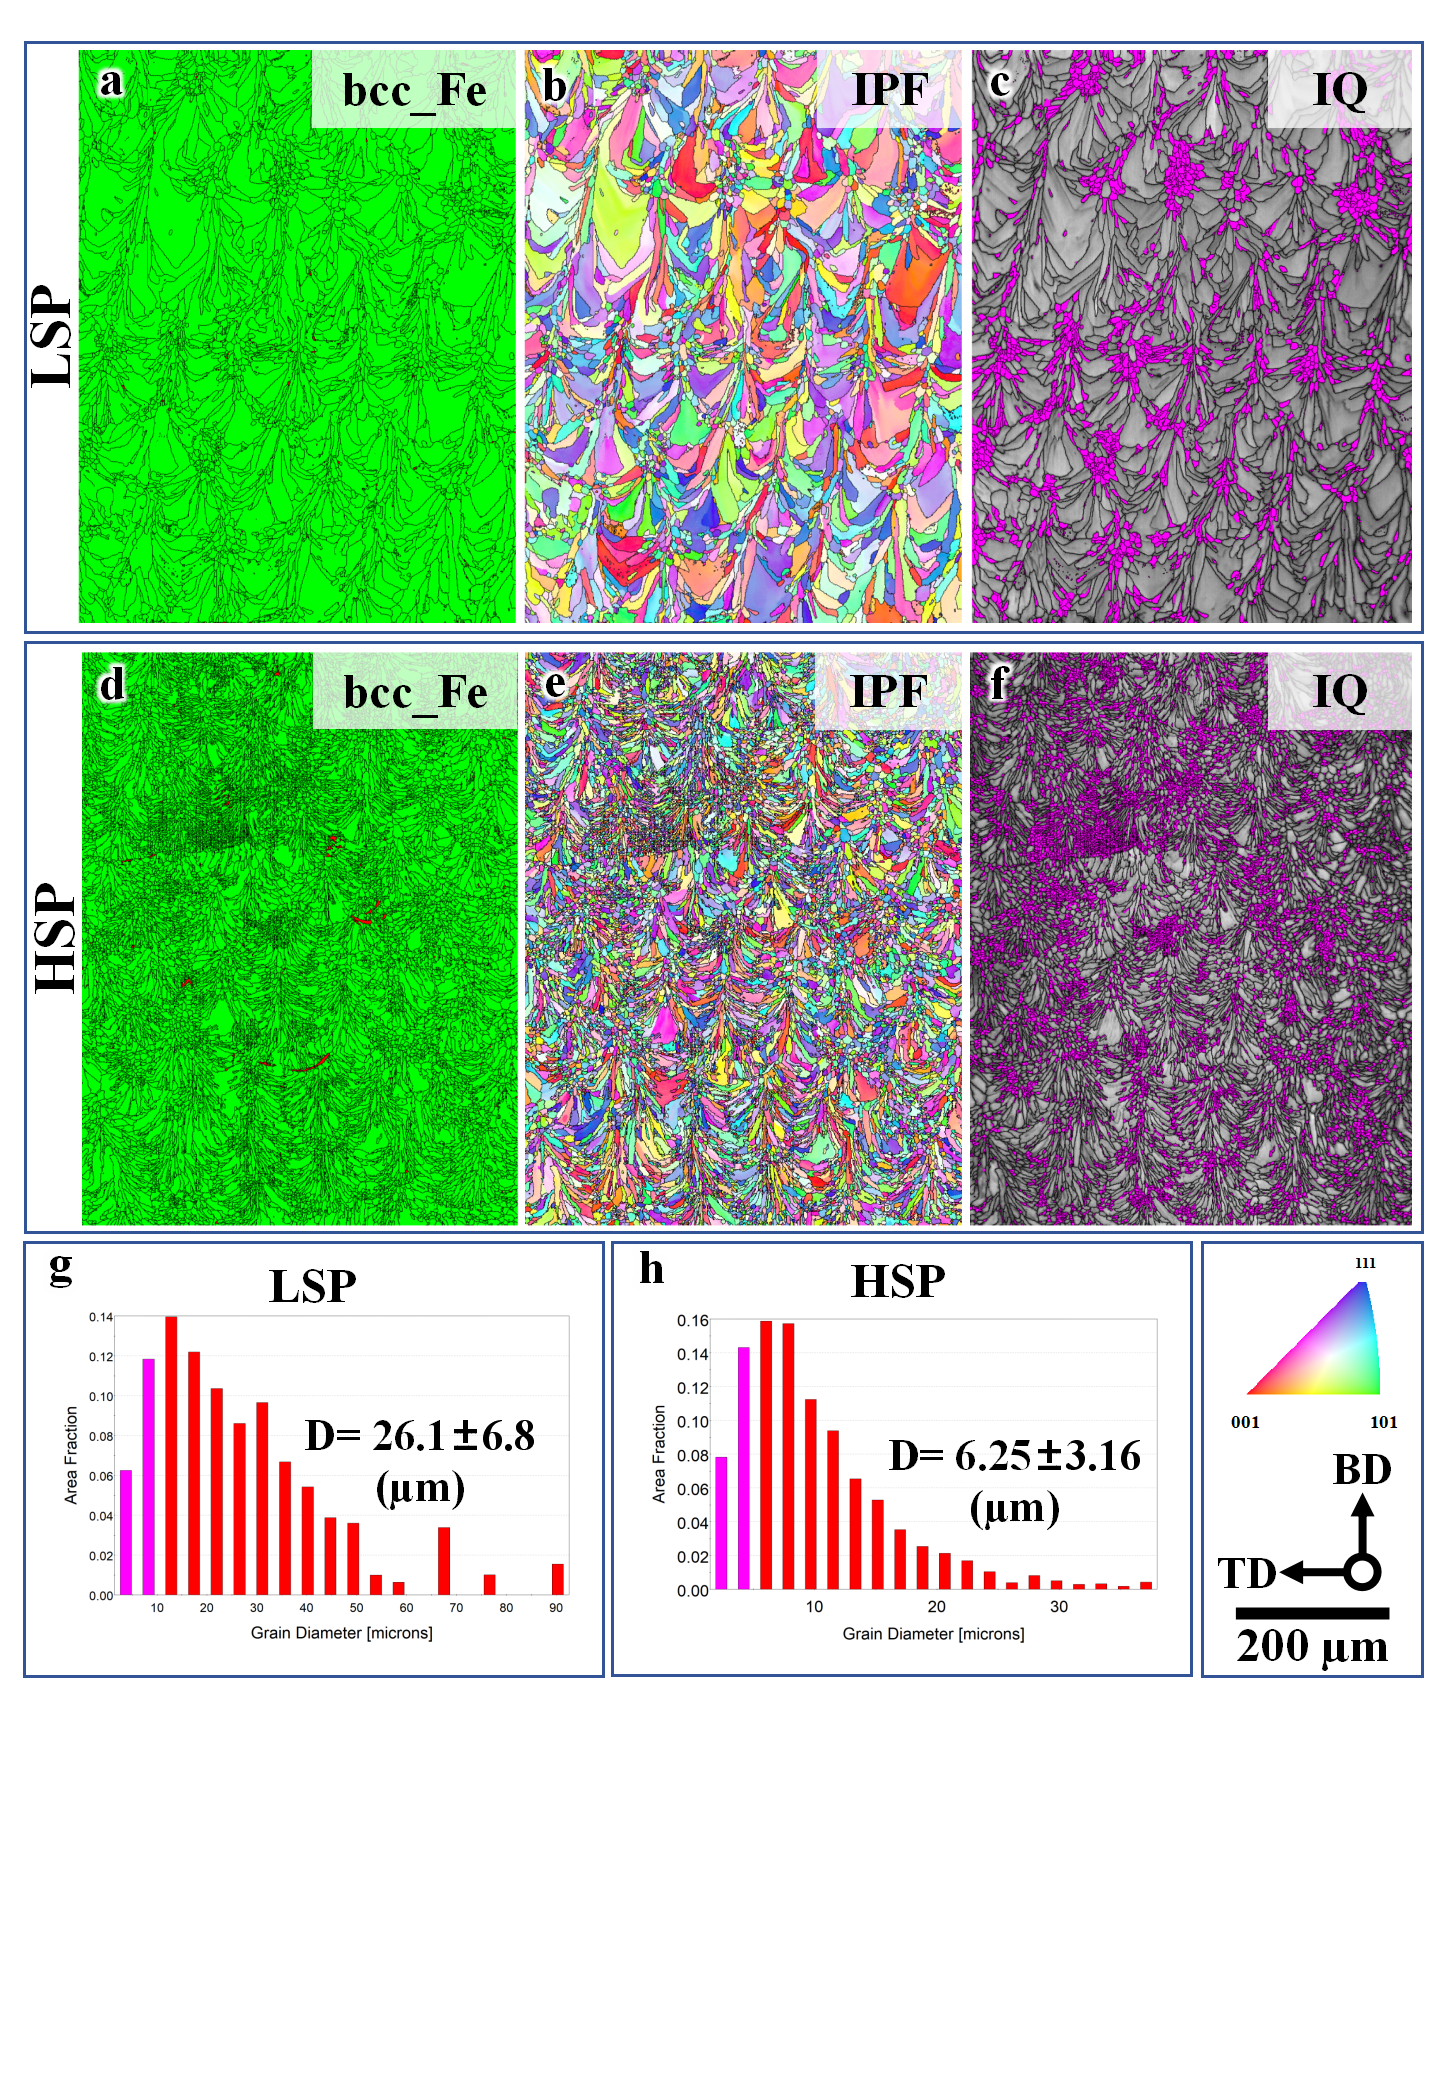
**

**Fig. S2. Comparison of the ferritic matrix microstructure in LSP and HSP samples.** (a-c) Phase map, IPF map, and IQ map for the sample fabricated with a laser scan speed of 600 mm/s (LSP). (d-f) Corresponding maps for the sample fabricated with 1400 mm/s (HSP), showing a pronounced grain refinement. (g, h) Grain size distribution histograms quantitatively confirming the reduction in average grain size from 26.1 ± 6.8 μm in LSP to 6.25 ± 3.16 μm in HSP.

**
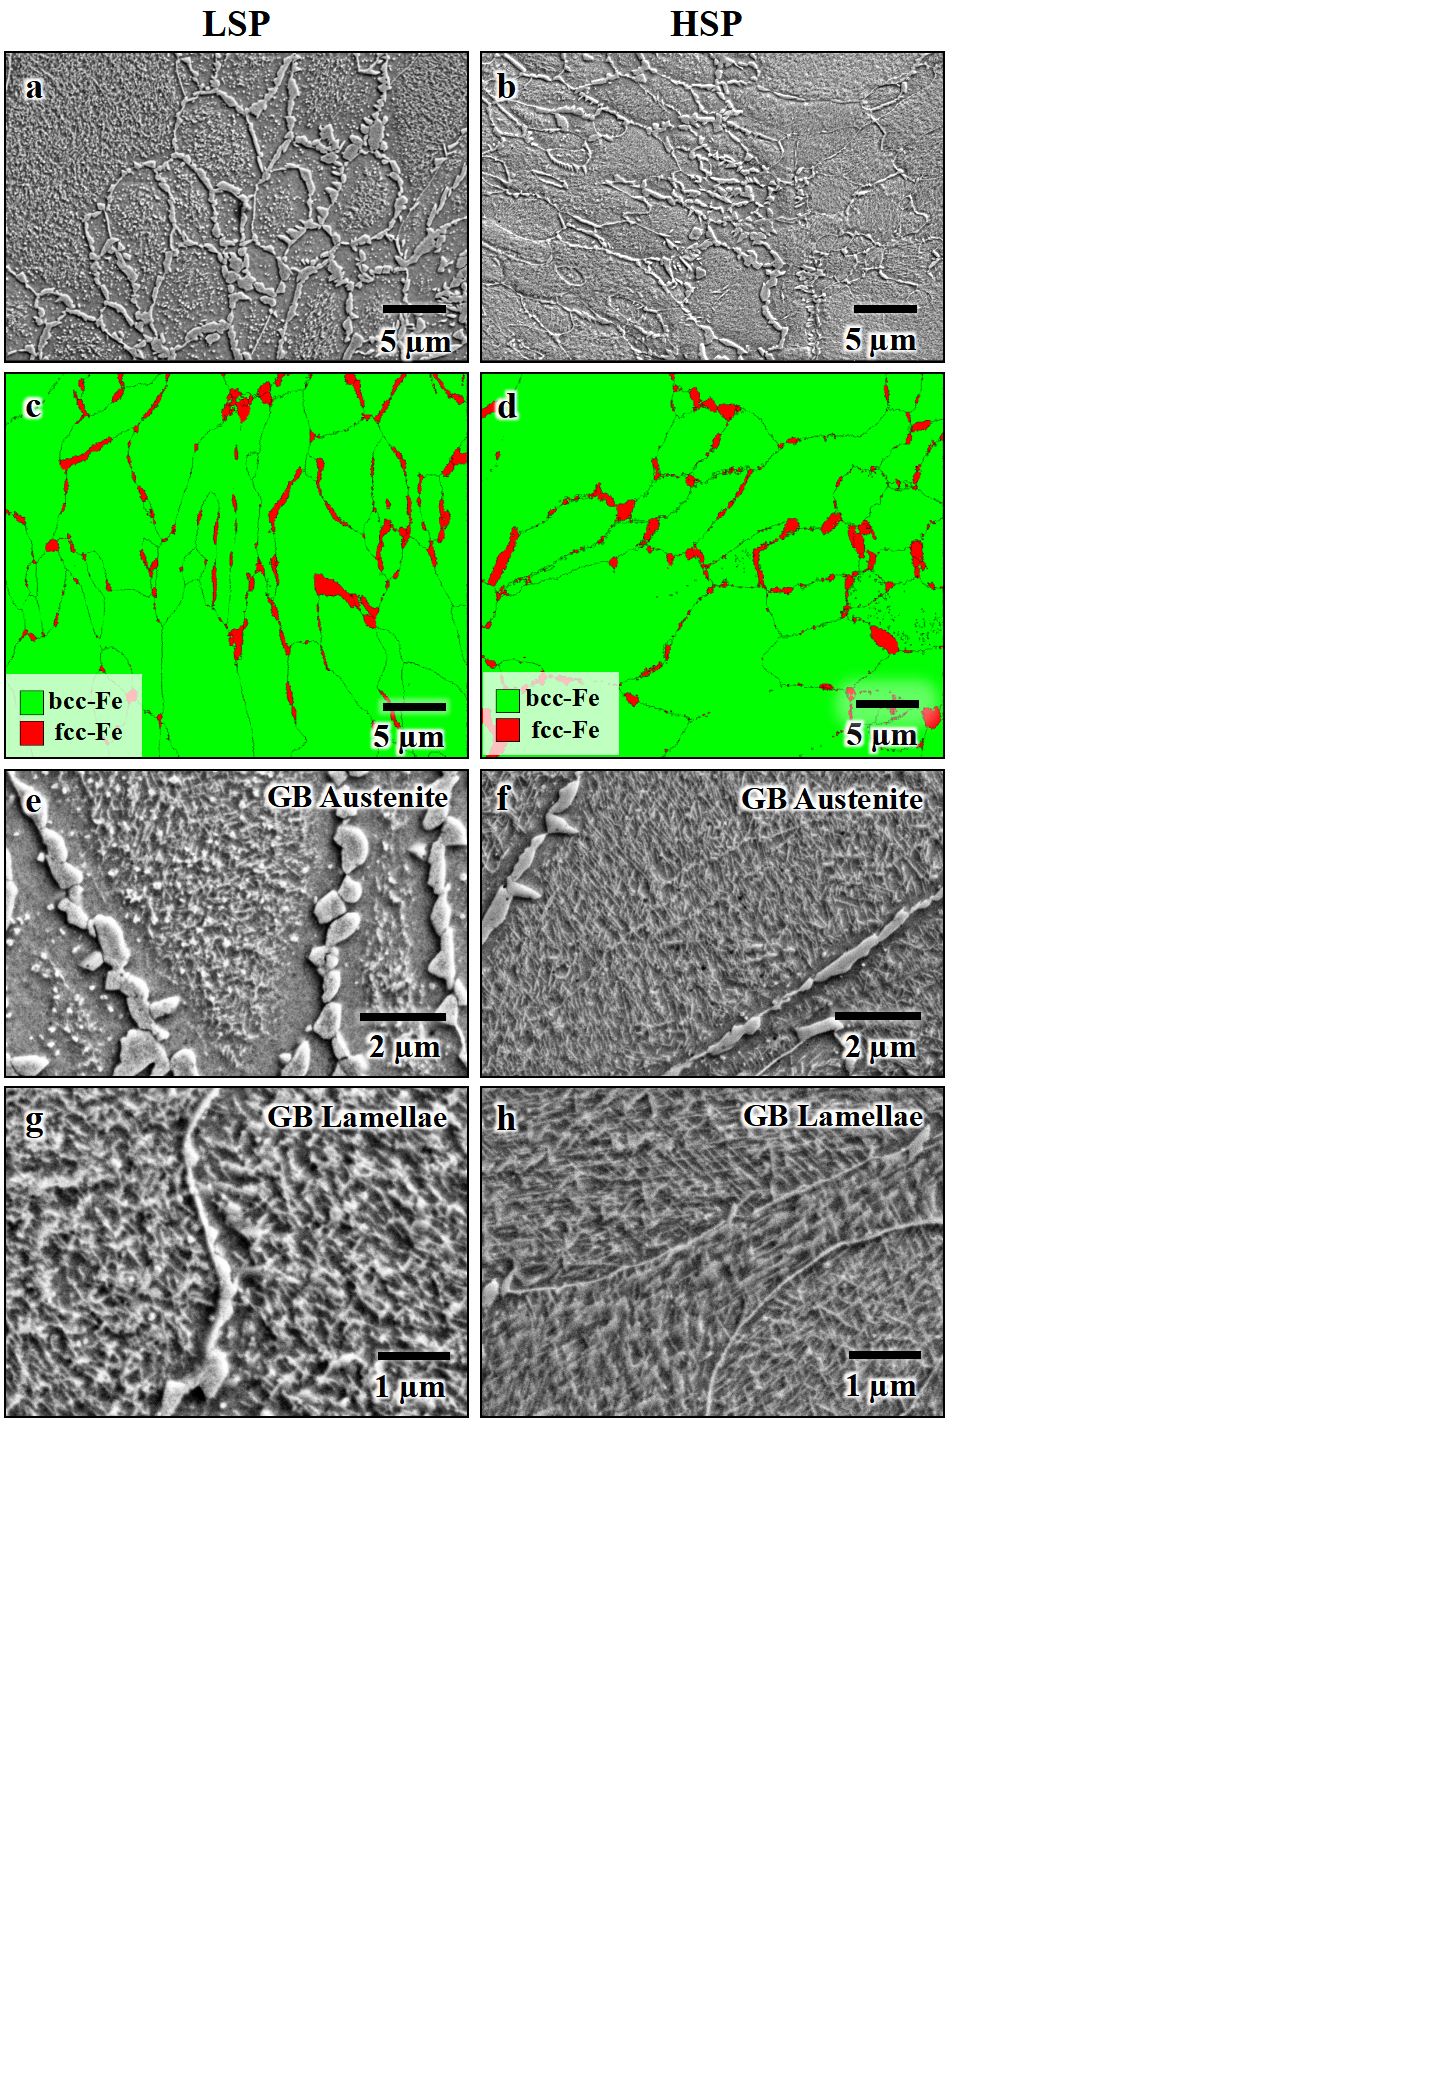
**

**Fig. S3.** **Microstructural characterization of the LSP and HSP samples.** ​(a, b) Secondary electron micrographs showing the overall morphology. (c, d) Phase maps identifying the bcc ferritic matrix (green) and fcc austenite phases (red). (e, f) High-magnification micrographs revealing the grain boundary (GB) austenite, which appears as bright, continuous networks along the ferrite boundaries. (g, h) High-magnification micrographs showing the lamellar GB structure, characterized by a finer and more complex interwoven morphology.


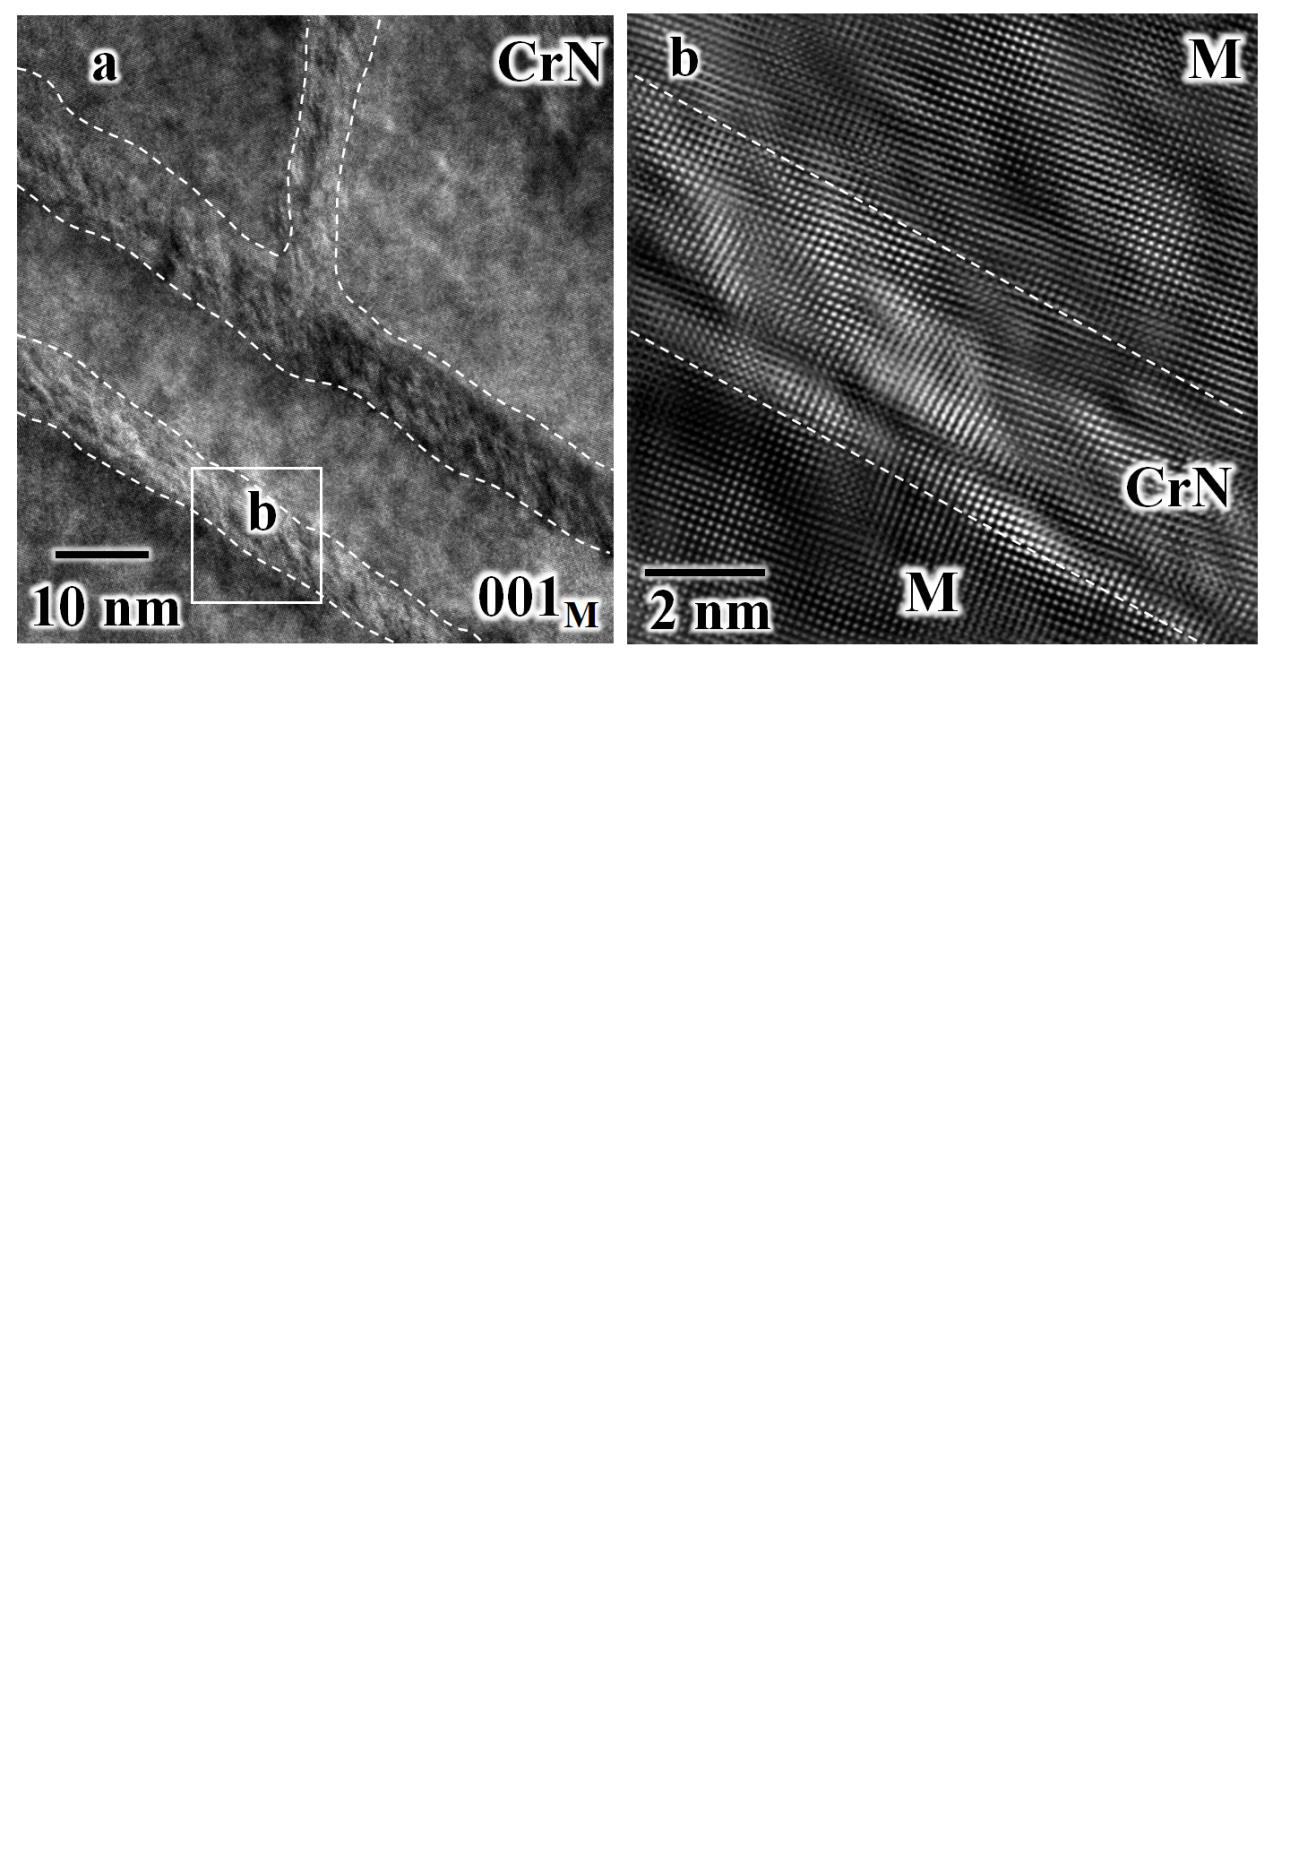


**Fig. S4. HRTEM micrographs of the intragranular CrN precipitates for the LSP sample.** (a) HRTEM micrographs illustrating the needle-like morphology of CrN precipitates (dashed outlines). (b) HRTEM micrographs of the regions marked in (a), demonstrating the coherent interface between CrN precipitates and the ferrite matrix with excellent lattice matching, while also revealing a high density of lattice defects within the CrN precipitates formed under ultra-fast solidification conditions.

**
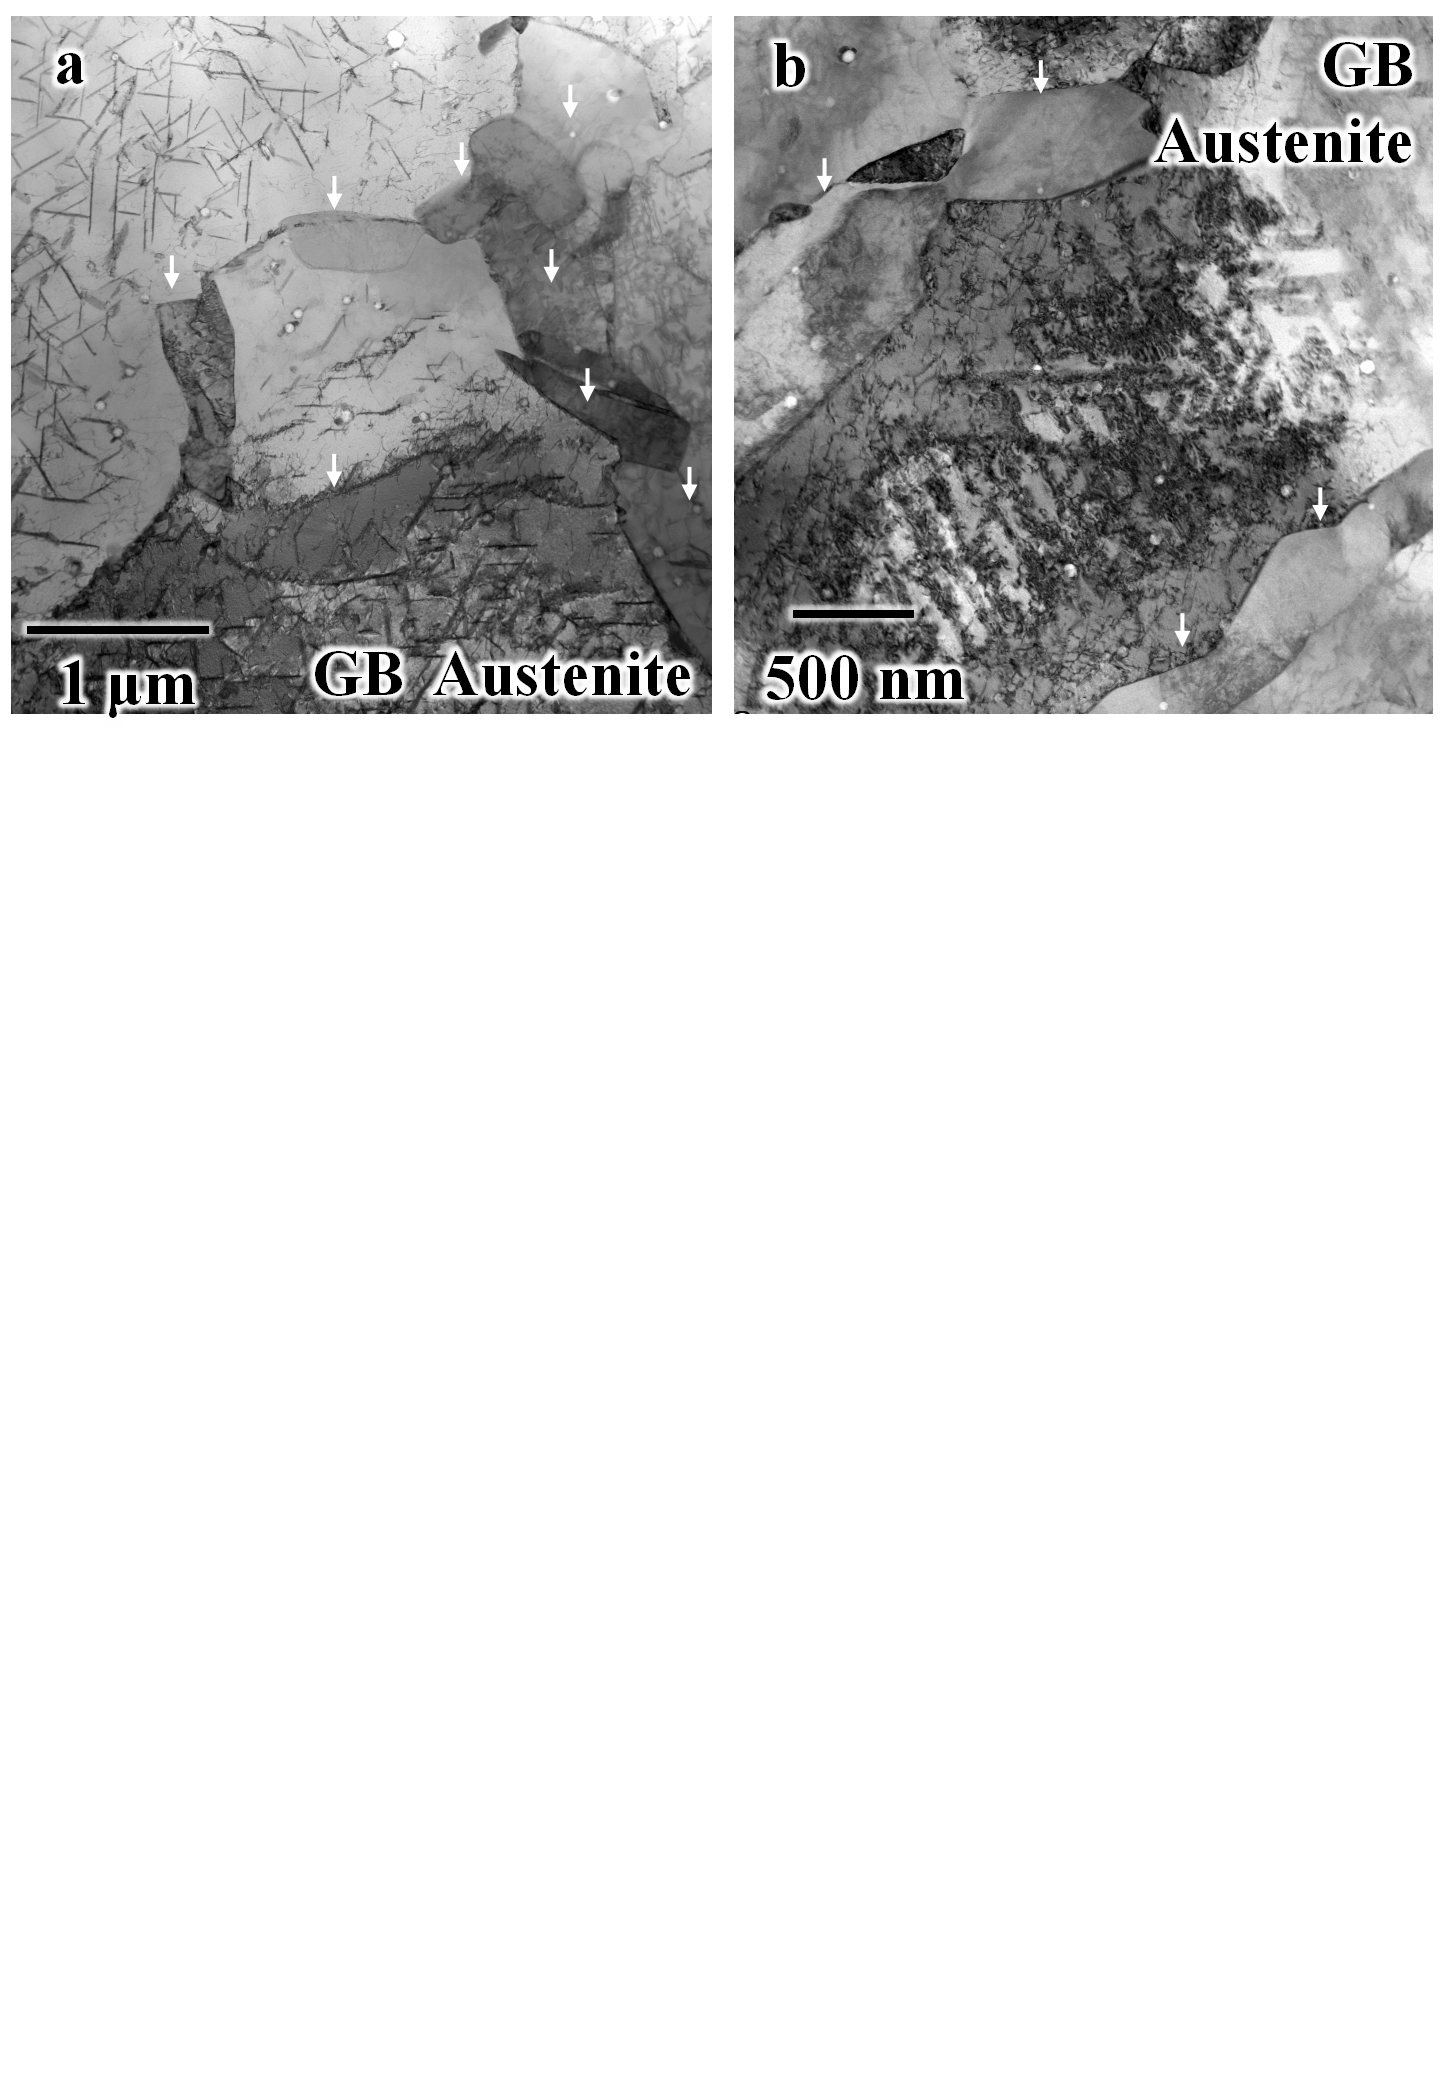
**

**Fig. S5.** STEM Bright-field micrographs demonstrating that ferrite grain boundaries are consistently encapsulated by austenite phase (white arrow).

**
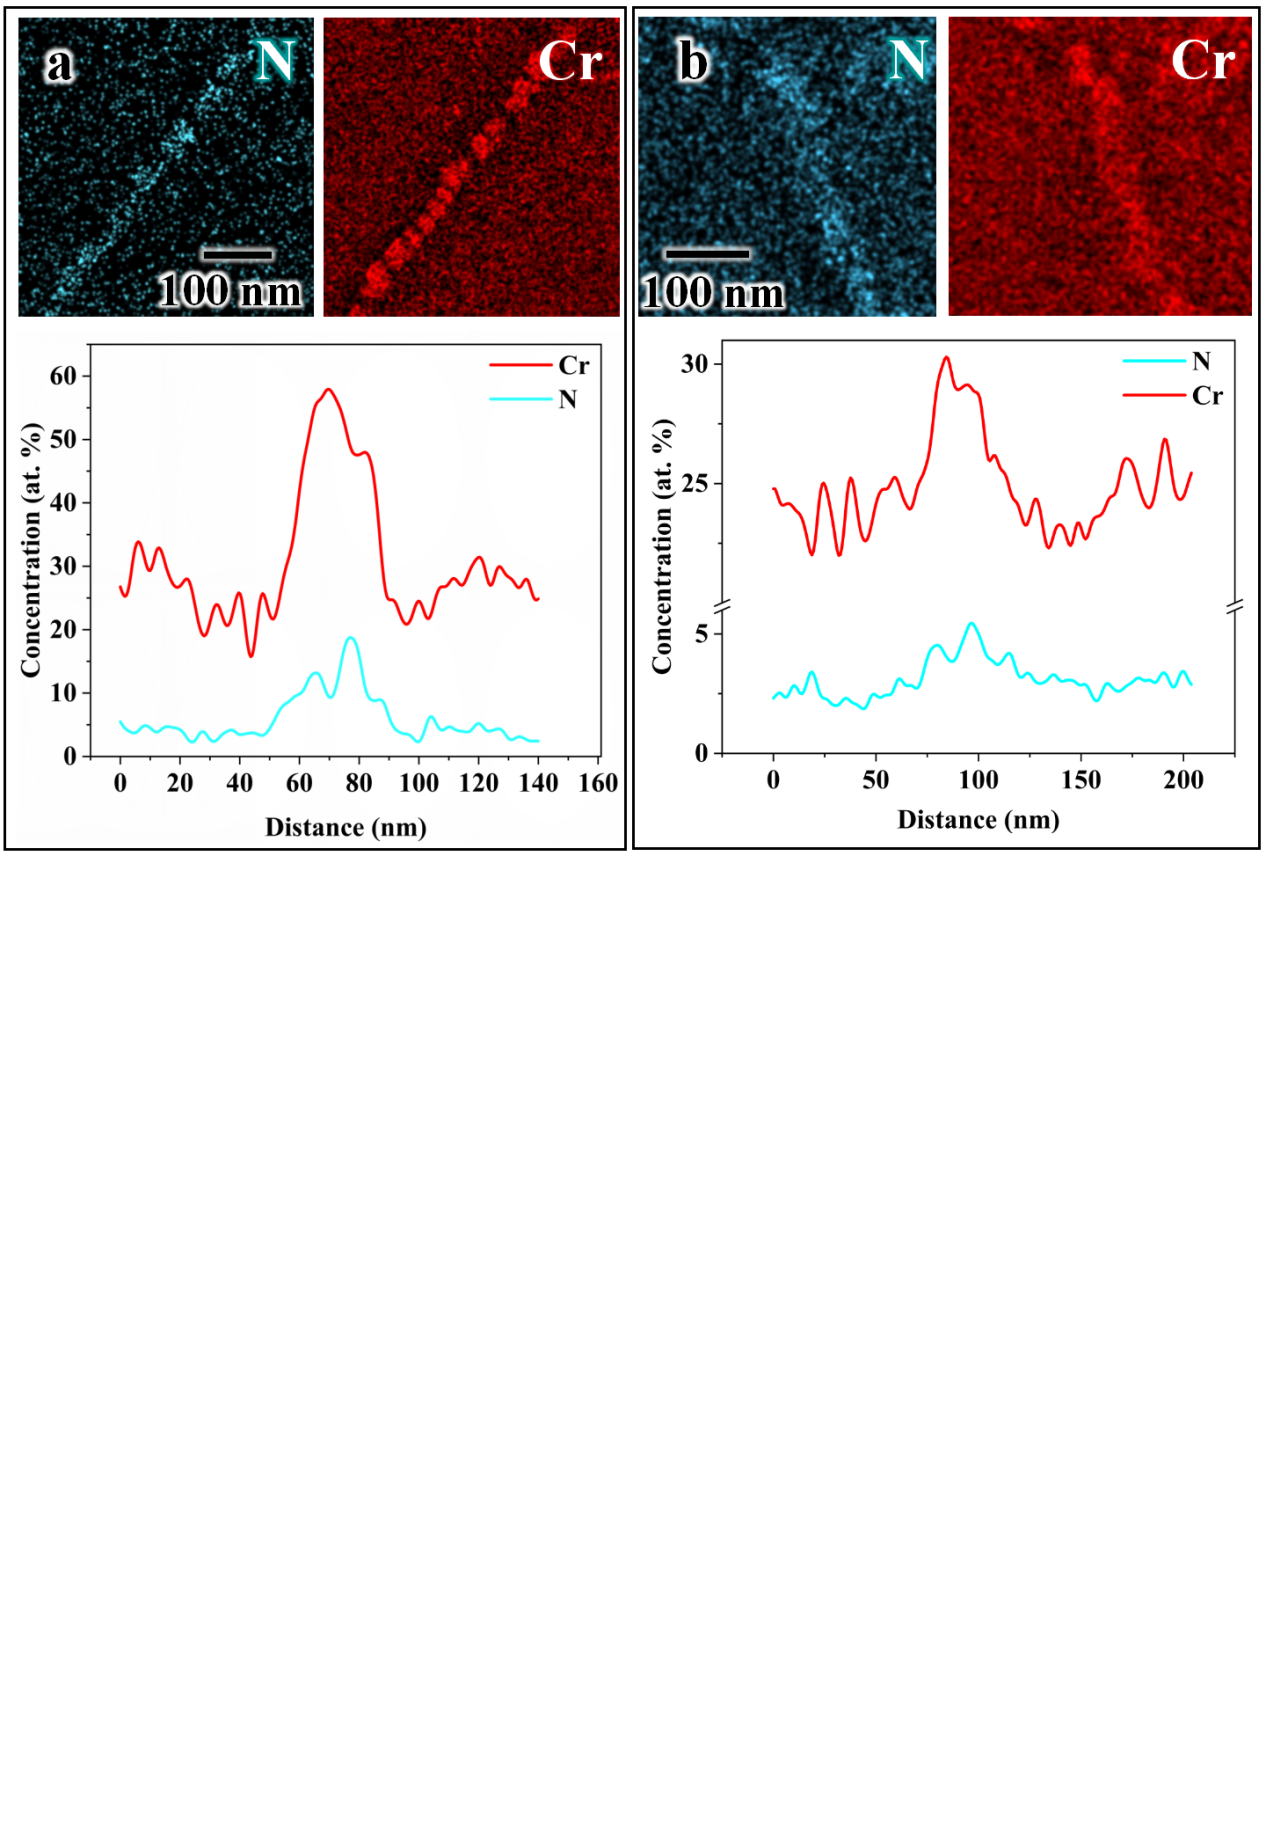
**

**Fig. S6. Characterization of grain boundary nitride at austenite-free regions via EDS analysis.** (a, b) EDS elemental maps for N and Cr, confirming the co-localization of Cr and N at the precipitates. EDS line-scanning profiles across a representative granular precipitate.

**
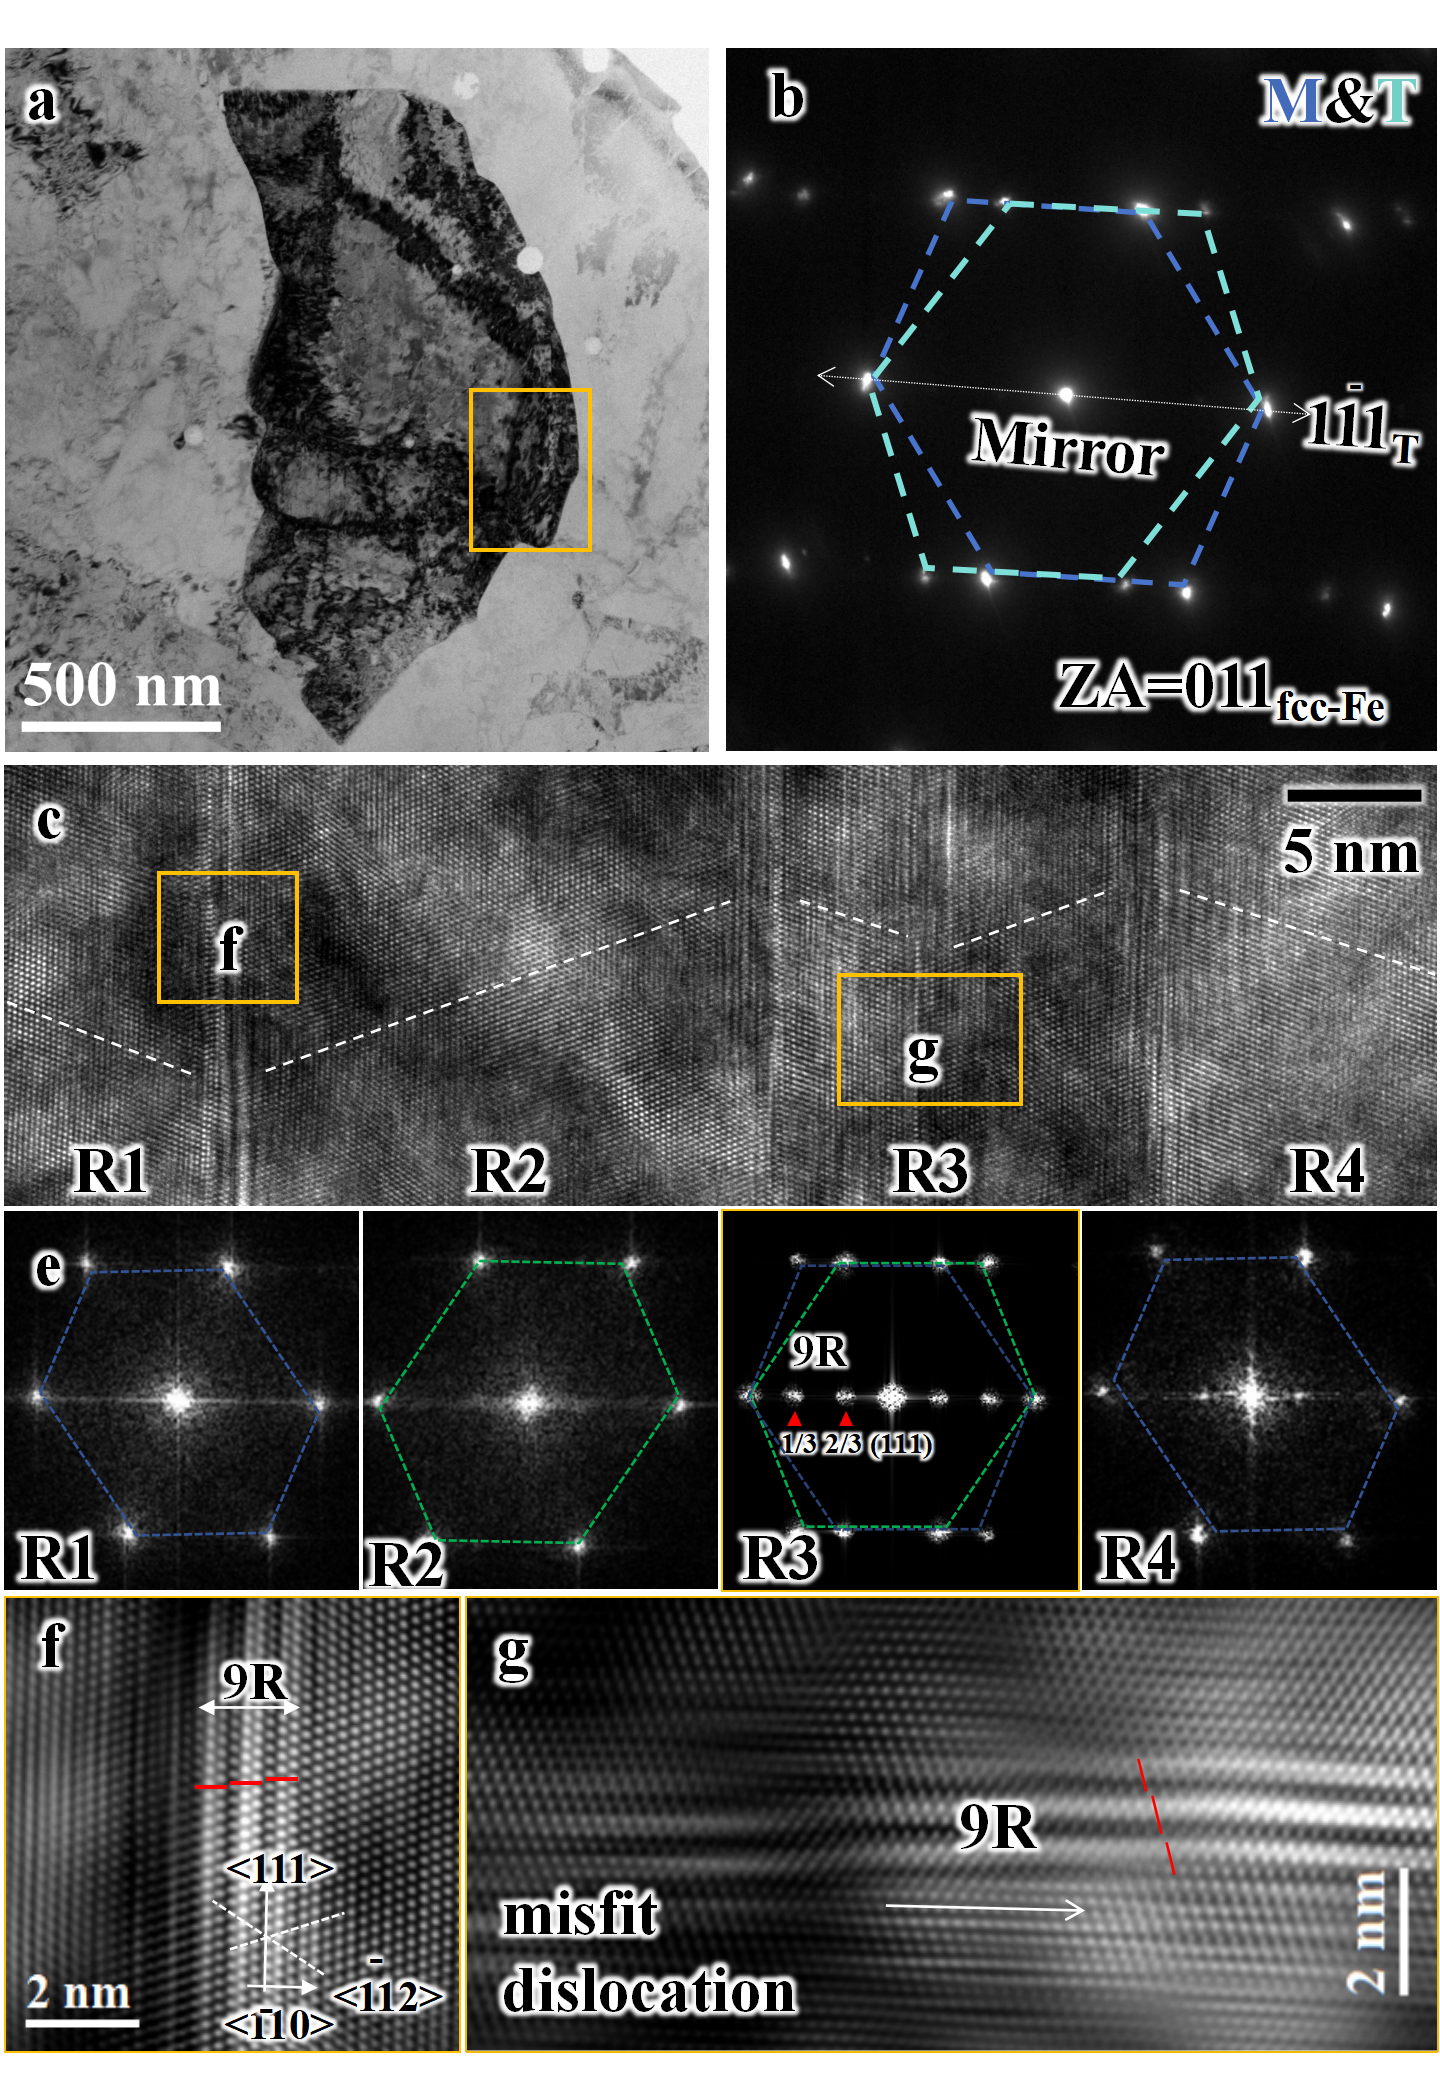
**

**Fig. S7. TEM analysis of the deformation-induced twinning in metastable austenite near the fracture surface after tensile.** ​(a) Bright field micrograph showing the overall contour of a prior-austenite grain with a complex, mottled contrast. (b) Magnified view of the region in (a), revealing a high density of fine, parallel lamellae identified as deformation twins. (c) SAED pattern acquired from the twinned region, indexed along the [011] zone axis. (d) HRTEM micrograph of a deformation twin boundary. (e) FFT patterns obtained from four adjacent regions (R1 to R4) marked in (d), demonstrating the presence of distinct twin variants. (f, g) Enlarged HRTEM micrographs of the areas outlined in (d), providing evidence of the 9R long-period ordered structure associated with the twins.


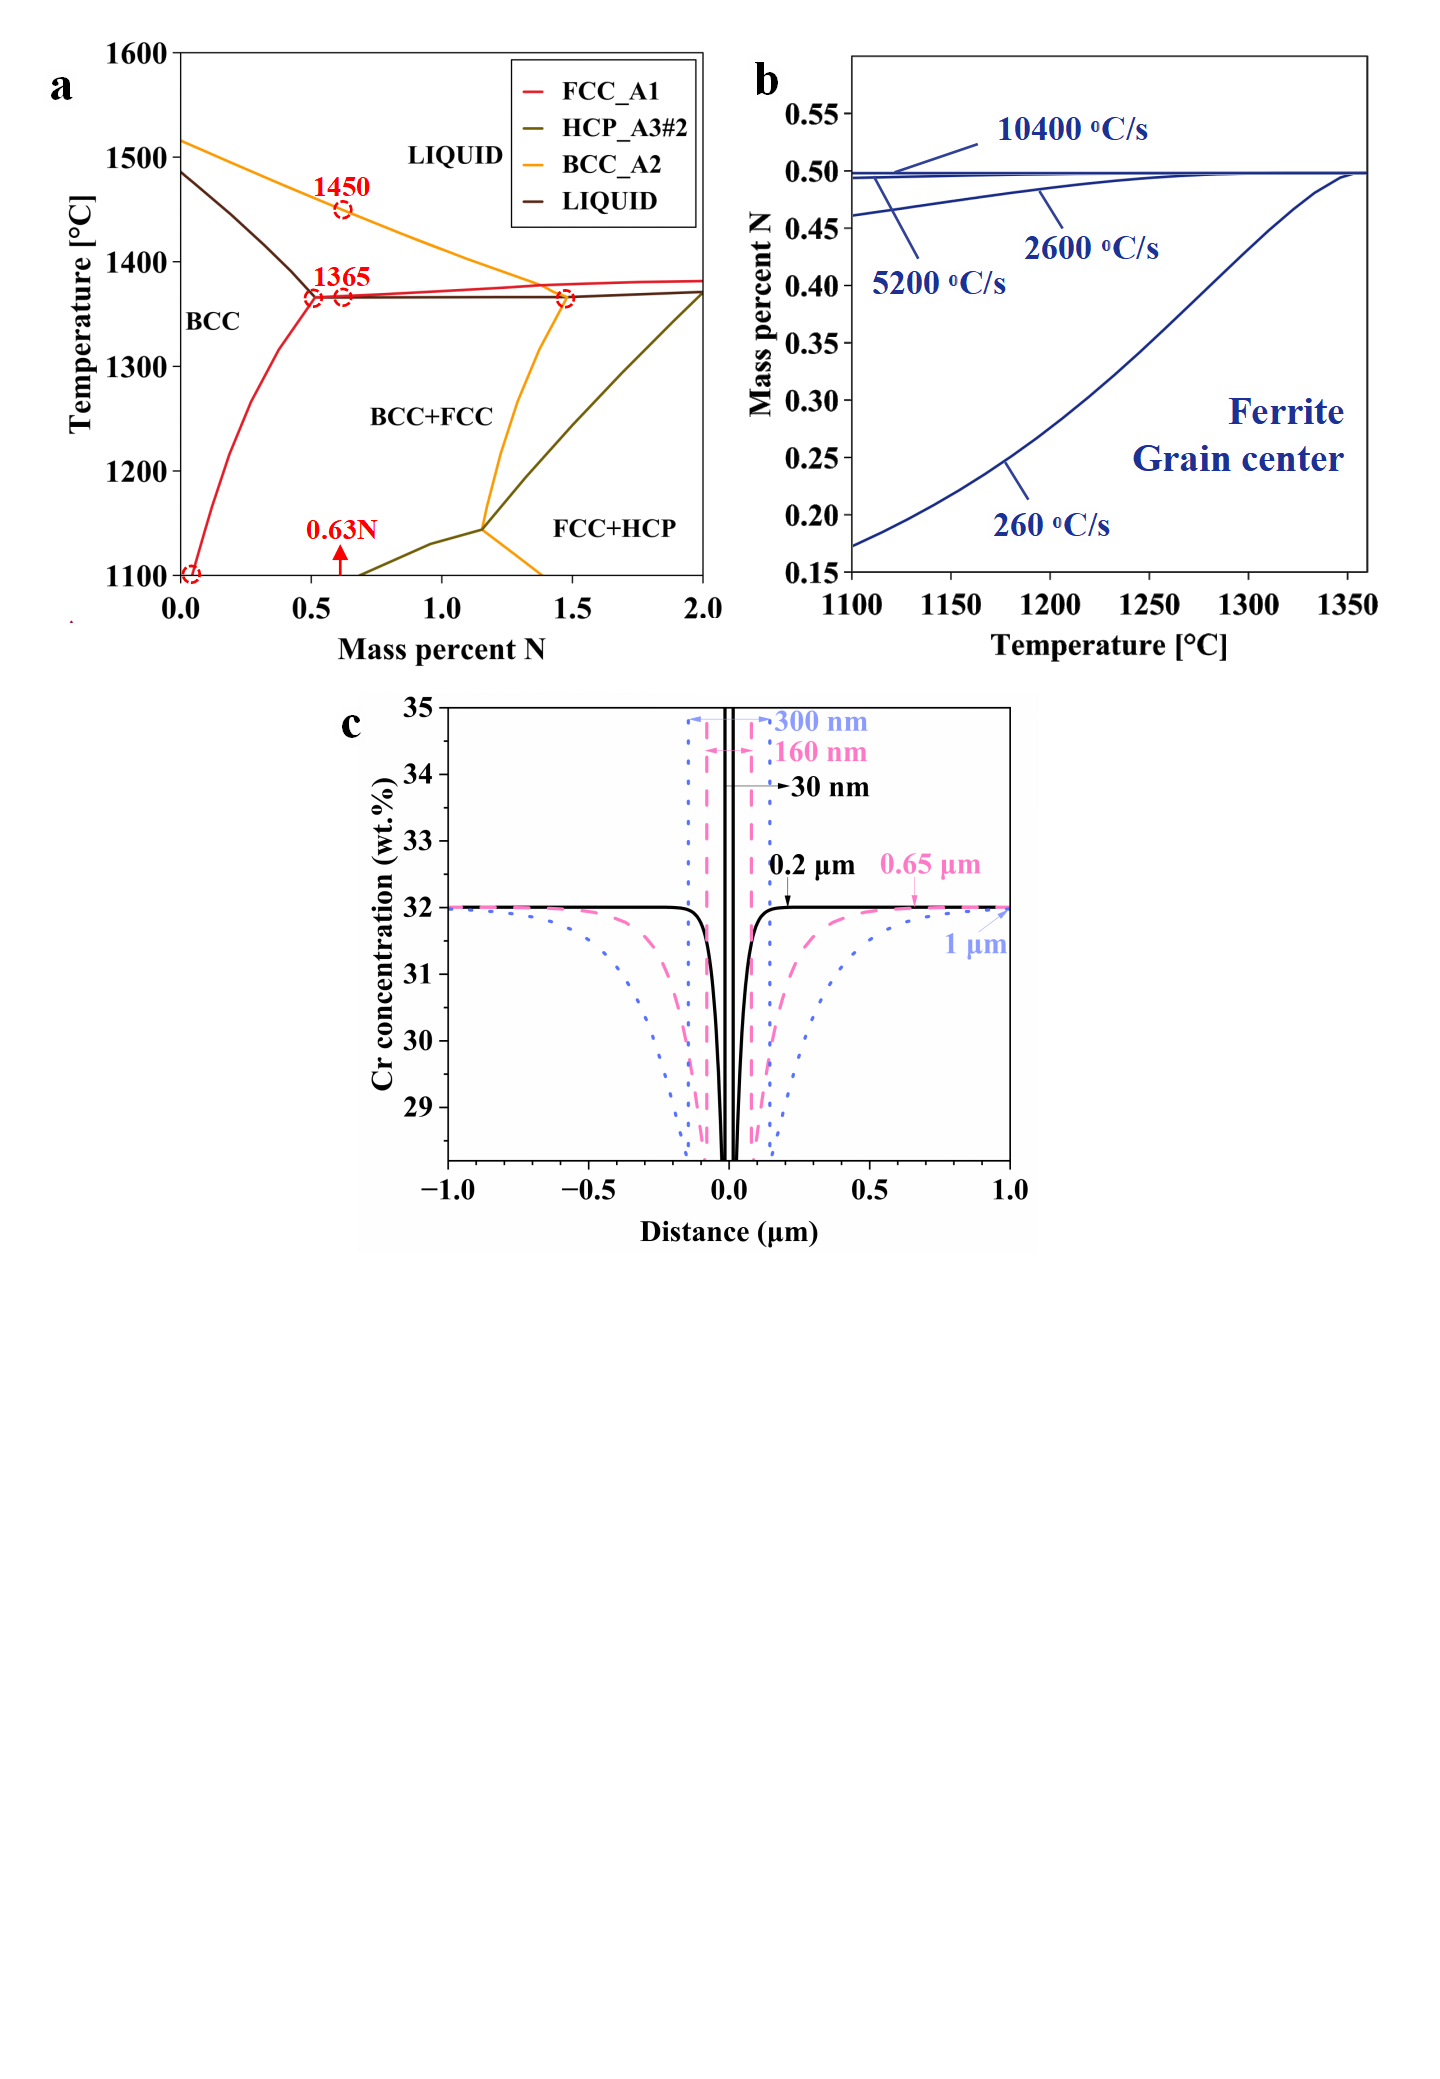


**Fig. S8. Thermodynamic and kinetic simulation of phase stability and nitrogen partitioning.** (a) Calculated vertical section of the Fe-32Cr-8Ni-3.5Mo-0.25Si-xN​ (wt.%) multicomponent system. (b) Dictra-simulated evolution of nitrogen concentration at the center of a ferrite grain as a function of temperature for different cooling rates. (c) Concentration profiles of chromium (Cr) around flaky Cr2N precipitates with various widths in a ferritic matrix. Different curves correspond to Cr2N precipitates of different thickness.


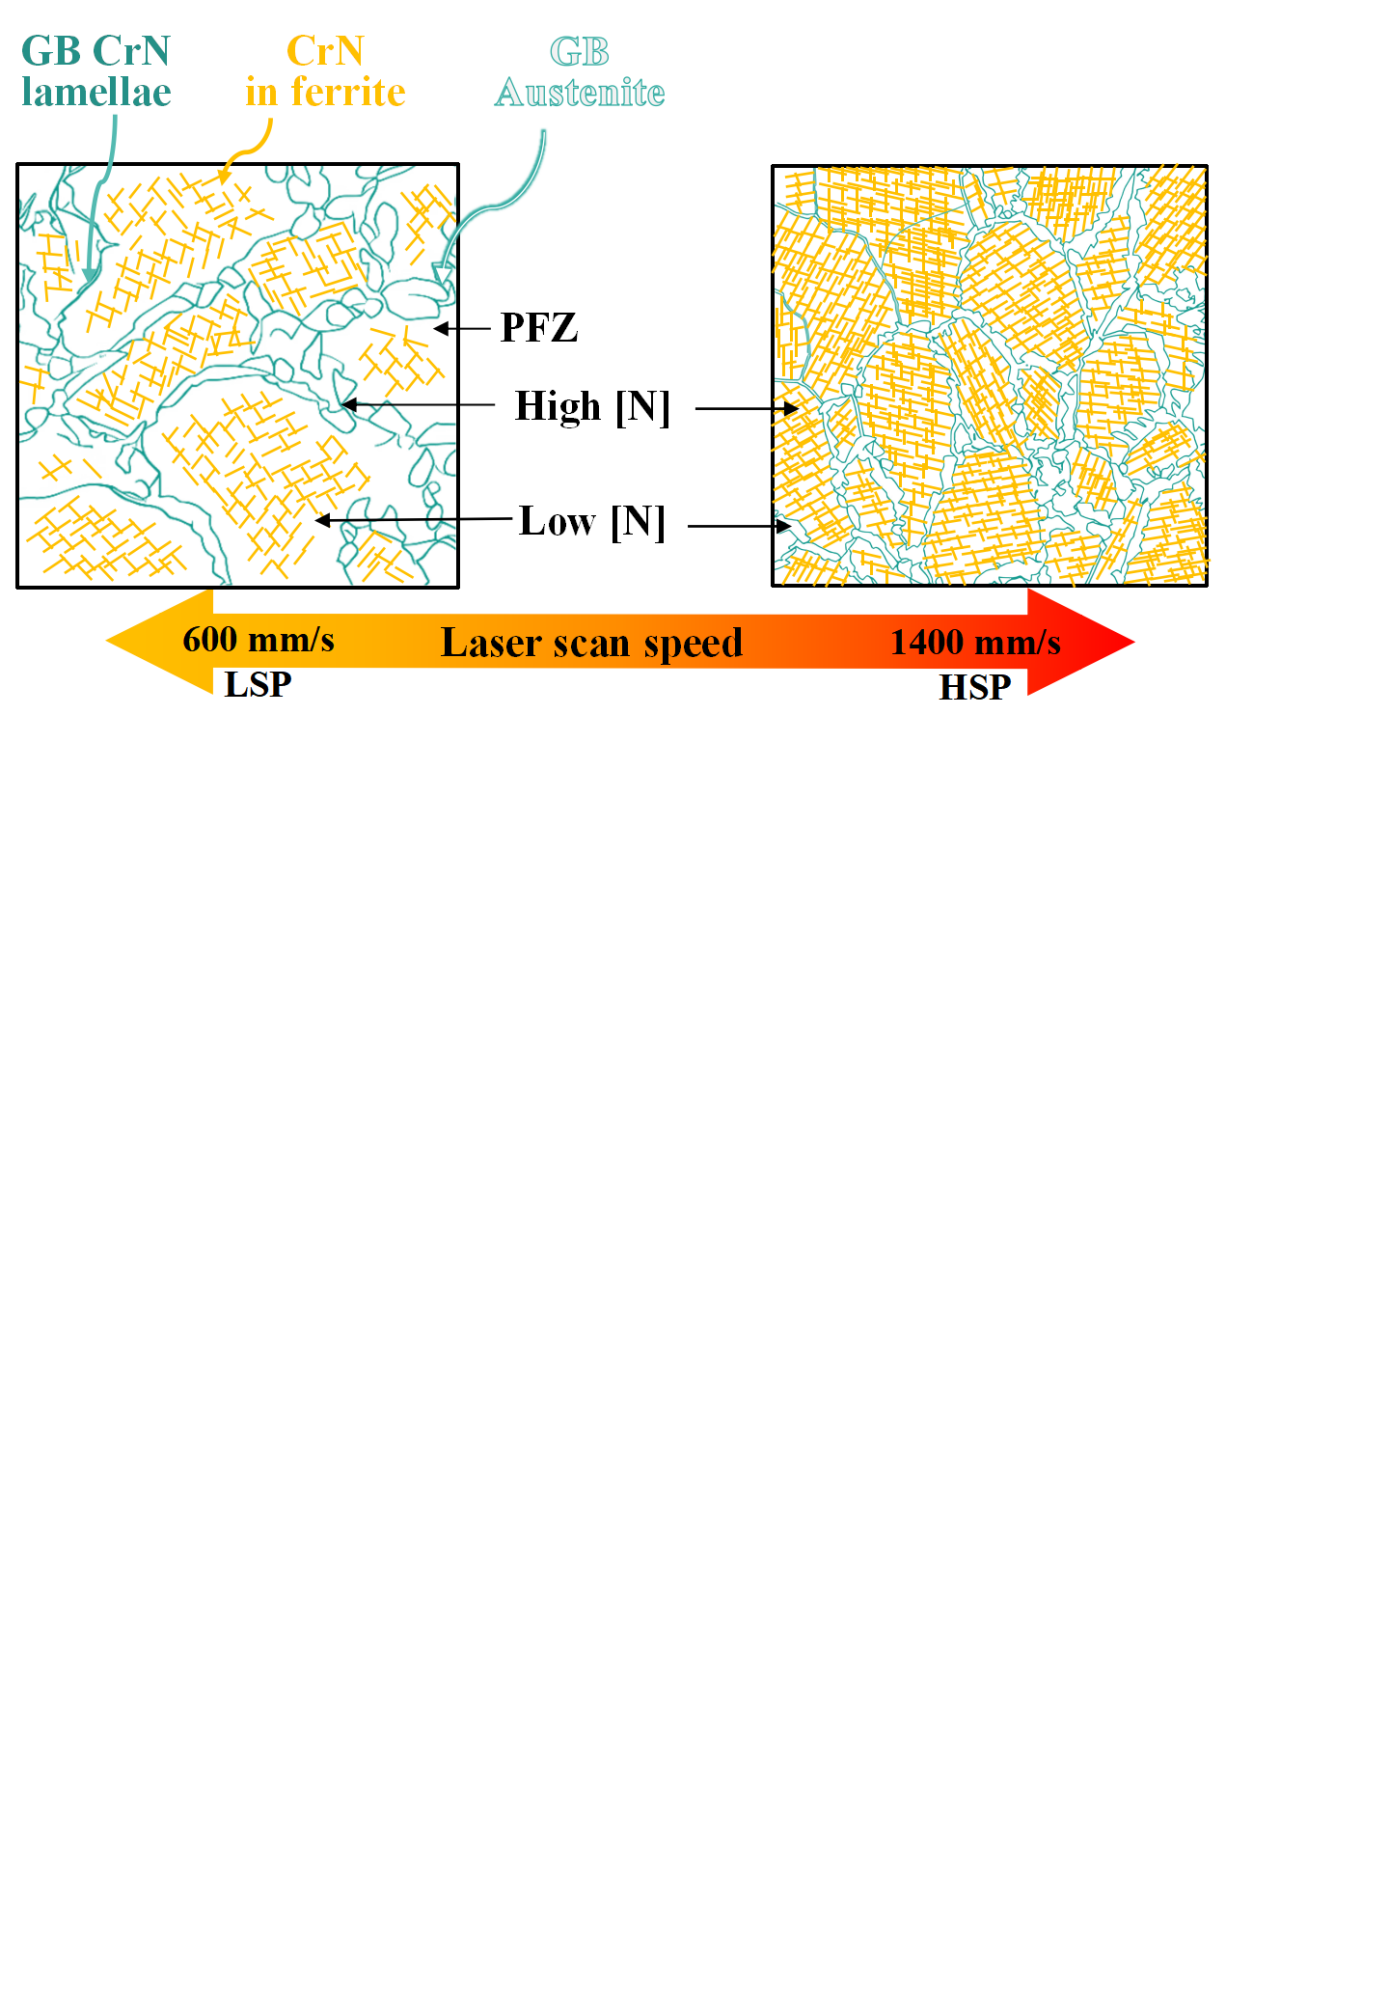


**Fig. S9.** Schematic illustration of the microstructure evolution in the LPBF high-nitrogen ferritic stainless steel as a function of laser scan speed. (The black arrows indicate two opposite scenarios of nitrogen (N) distribution between ferrite and grain boundary austenite.)
